# Supplementary material
Source: PubMed Central journal article supplement (PMC4321300)
Supplement: pnas.1408800112.st01.pdf [file pnas.1408800112.st01.pdf]

**Table S1.** Sample survey responses relating to each group process provided by expert mountain climbers (Study 1). Participants responded to the following two free-response questions - “According to your own personal views, what are the specific team-level factors that contribute to a successful [failed] climbing expedition?”

| <b>Coordination Examples</b>                                                                                                | <b>Psychological Safety Examples</b>                                                                                            | <b>Information Sharing Examples</b>                                                   |
|-----------------------------------------------------------------------------------------------------------------------------|---------------------------------------------------------------------------------------------------------------------------------|---------------------------------------------------------------------------------------|
| <i>A team that doesn't act together with unified coordinated goals set with a clear objective will not work efficiently</i> | <i>An open atmosphere where frank discussion can take place</i>                                                                 | <i>Failure to clearly state when someone is falling behind/or having difficulties</i> |
| <i>Lack of team coordination</i>                                                                                            | <i>Team members being able to point out mistakes or give input without fear of criticism</i>                                    | <i>Information misunderstandings between team members</i>                             |
| <i>Poor coordination of resources</i>                                                                                       | <i>People need to know each other and be comfortable around one another. They need to feel comfortable speaking their mind.</i> | <i>Breakdowns in Communication between team members</i>                               |
| Note: Sample responses were taken from both “success” and “failure” free response questions.                                |                                                                                                                                 |                                                                                       |
