# Supplementary material
Source: PubMed Central journal article supplement (PMC4321300)
Supplement: pnas.1408800112.st02.pdf [file pnas.1408800112.st02.pdf]

**Table S2.** Overview of variables used in the analyses

| Dependent Variables | Independent Variables            | Environmental Factors | Risk-Related Variables                                            | Expedition Characteristics                  | Country Characteristics <sup>b</sup>          | Other Cultural Values                 |
|---------------------|----------------------------------|-----------------------|-------------------------------------------------------------------|---------------------------------------------|-----------------------------------------------|---------------------------------------|
| Total summits       | Hierarchy Composite (Schwartz)   | Region                | Standard route dummy                                              | Average age                                 | Gini                                          | Mastery (Schwartz)                    |
| Total deaths        | Power Distance (Hofstede)        | Season                | Illegal expedition (1=yes, 0=no; summit models only) <sup>a</sup> | Total people on expedition                  | GDP per capita (log)                          | Harmony (Schwartz)                    |
|                     | Combined (Schwartz and Hofstede) | Year                  | Terminated because too risky (1=yes, 0=no; death models only)     | Number of hired sherpas                     | Population (log)                              | Embeddedness Index (Schwartz)         |
|                     |                                  |                       |                                                                   | Number of hired non-sherpas                 | Climatic Demands Index                        | Individualism (IDV; Hofstede)         |
|                     |                                  |                       |                                                                   | Unique expedition roles                     | Mean Elevation Native Country                 | Masculinity (MAS; Hofstede)           |
|                     |                                  |                       |                                                                   | Leader experience                           | Mean years of schooling (adults) <sup>c</sup> | Uncertainty Avoidance (UAI; Hofstede) |
|                     |                                  |                       |                                                                   | Average climber experience                  | Industrial Performance Index <sup>d</sup>     |                                       |
|                     |                                  |                       |                                                                   | Standard Deviation of Climber Experience    | Democracy Index <sup>e</sup>                  |                                       |
|                     |                                  |                       |                                                                   | Total camp sites                            |                                               |                                       |
|                     |                                  |                       |                                                                   | Number using oxygen                         |                                               |                                       |
|                     |                                  |                       |                                                                   | Total women                                 |                                               |                                       |
|                     |                                  |                       |                                                                   | Peak height (log)                           |                                               |                                       |
|                     |                                  |                       |                                                                   | High point reached (log; death models only) |                                               |                                       |
|                     |                                  |                       |                                                                   | Total summits (death models only)           |                                               |                                       |

<sup>a</sup>There was no variance in the illegal dummy variable for deaths on group expeditions (i.e. all deaths occurred on legal expeditions) so this variable was excluded from death models.

<sup>b</sup> Values from the earliest available year of all country characteristics were used for expeditions that occurred before the earliest available year.

<sup>c</sup> Data was available for the following years: 1980, 1985, 1990, 2000, 2005, 2006, 2007, 2008, 2009, 2010, 2011, and 2012. The 1980 values were used for all expeditions that occurred before 1980 through 1982. The 1985 values were used for expeditions that occurred between 1983 and 1987. The 1990 values were used for expeditions that occurred between 1988 and 1994. The 2000 values were used for expeditions that occurred between 1995 and 2002. The 2005 values were used for expeditions that occurred between 2003 and 2005 (data source: <http://hdr.undp.org/en/content/mean-years-schooling-adults-years>).

<sup>d</sup> Data was available for the following years: 1990, 1995, 2000, 2005, 2006, 2007, 2008, 2009, and 2010. The 1990 values were used for all expeditions that occurred before 1990 through 1992. The 1995 values were used for expeditions that occurred between 1993 and 1997. The 2000 values were used for expeditions that occurred between 1998 and 2002. The 2005 values were used for expeditions that occurred between 2003 and 2005 (data source: <http://www.unido.org/data1/Statistics/Research/cip.html>).

<sup>e</sup> Data was available for the following years: 2006, 2008, 2010, 2011, and 2012. The 2006 values were used for expeditions that occurred in 2006 or earlier. The 2008 values were used for expeditions that occurred in 2007 and 2008. The 2010 values were used for expeditions that occurred in 2009 and 2010 (data source: [https://portonev.gov.cv/dhub/porton.por\\_global.open\\_file?p\\_doc\\_id=1034](https://portonev.gov.cv/dhub/porton.por_global.open_file?p_doc_id=1034)).
