# Supplementary material
Source: PubMed Central journal article supplement (PMC4321300)
Supplement: pnas.1408800112.st03.pdf [file pnas.1408800112.st03.pdf]

**Table S3.** Correlations among independent variables, control variables, and dependent variables

| No. | Type    | Variable                                   | Obs. | Mean    | Std. Dev. | 1       | 2       | 3       | 4       | 5       | 6       | 7       | 8       | 9       | 10      | 11      | 12      | 13      | 14      | 15      | 16      | 17      | 18      | 19      | 20      | 21      | 22      | 23      | 24      | 25      | 26      | 27     | 28      | 29 |  |
|-----|---------|--------------------------------------------|------|---------|-----------|---------|---------|---------|---------|---------|---------|---------|---------|---------|---------|---------|---------|---------|---------|---------|---------|---------|---------|---------|---------|---------|---------|---------|---------|---------|---------|--------|---------|----|--|
| 1   | IV      | Hierarchy Composite (Schwartz)             | 4025 | -0.24   | 1.07      |         |         |         |         |         |         |         |         |         |         |         |         |         |         |         |         |         |         |         |         |         |         |         |         |         |         |        |         |    |  |
| 2   | IV      | Power Distance (Hofstede)                  | 4025 | 51.82   | 16.30     | .309**  |         |         |         |         |         |         |         |         |         |         |         |         |         |         |         |         |         |         |         |         |         |         |         |         |         |        |         |    |  |
| 3   | IV      | Hierarchy (Schwartz and Hofstede) Combined | 4025 | -0.35   | 0.83      | .953**  | .582**  |         |         |         |         |         |         |         |         |         |         |         |         |         |         |         |         |         |         |         |         |         |         |         |         |        |         |    |  |
| 4   | Control | Year                                       | 4025 | 1996.68 | 13.04     | -.126** | .046**  | -.093** |         |         |         |         |         |         |         |         |         |         |         |         |         |         |         |         |         |         |         |         |         |         |         |        |         |    |  |
| 5   | Control | Standard Route Dummy (1=yes, 0=no)         | 4025 | 0.51    | 0.50      | -.086** | .046**  | -.059** | .388**  |         |         |         |         |         |         |         |         |         |         |         |         |         |         |         |         |         |         |         |         |         |         |        |         |    |  |
| 6   | Control | Illegal Expedition Dummy (1=yes, 0=no)     | 4025 | 0.01    | 0.08      | -0.021  | 0.022   | -0.011  | -0.71** | -0.03*  |         |         |         |         |         |         |         |         |         |         |         |         |         |         |         |         |         |         |         |         |         |        |         |    |  |
| 7   | Control | Terminated Because Too Risky (1=yes, 0=no) | 4025 | 0.44    | 0.50      | -0.10** | -.079** | -.119** | -.044** | -.146** | -.059** |         |         |         |         |         |         |         |         |         |         |         |         |         |         |         |         |         |         |         |         |        |         |    |  |
| 8   | Control | Average Age of Climbers                    | 4025 | 36.36   | 6.88      | -.133** | -.044** | -.128** | .417**  | -.164** | -0.028  | 0.003   |         |         |         |         |         |         |         |         |         |         |         |         |         |         |         |         |         |         |         |        |         |    |  |
| 9   | Control | Number of Expedition Members               | 4025 | 7.16    | 5.29      | .244**  | .161**  | .260**  | -.200** | -.032*  | -.045** | -.122** | -.107** |         |         |         |         |         |         |         |         |         |         |         |         |         |         |         |         |         |         |        |         |    |  |
| 10  | Control | Number of Hired Sherpas                    | 4025 | 0.89    | 1.52      | .209**  | .079**  | .204**  | -0.023  | .112**  | -.035*  | -.195** | 0.022   | .491**  |         |         |         |         |         |         |         |         |         |         |         |         |         |         |         |         |         |        |         |    |  |
| 11  | Control | Number of Hired Non-sherpas                | 4025 | 0.18    | 0.93      | -.118** | .059**  | .119**  | .060**  | 0.03    | -0.012  | -.047** | 0.019   | .296**  | .072**  |         |         |         |         |         |         |         |         |         |         |         |         |         |         |         |         |        |         |    |  |
| 12  | Control | Unique Expedition Roles                    | 4025 | 3.03    | 1.22      | .266**  | .120**  | .265**  | -.315** | -.065** | -.045** | -.088** | -.132** | .678**  | .448**  | .143**  |         |         |         |         |         |         |         |         |         |         |         |         |         |         |         |        |         |    |  |
| 13  | Control | Leader Experience                          | 4025 | 1.37    | 2.96      | -0.02   | 0.004   | -0.016  | .183**  | 0.024   | -0.014  | -.031*  | .266**  | -.051** | 0.029   | 0.009   | -.073** |         |         |         |         |         |         |         |         |         |         |         |         |         |         |        |         |    |  |
| 14  | Control | Average Climber Experience                 | 4025 | 2.62    | 3.60      | .044**  | .031*   | .047**  | .282**  | .149**  | -.031   | -.109** | .260**  | -.071** | .281**  | 0.025   | 0.009   | .392**  |         |         |         |         |         |         |         |         |         |         |         |         |         |        |         |    |  |
| 15  | Control | Standard Deviation of Climb Experience     | 4025 | 3.31    | 5.05      | .074**  | .051**  | .079**  | .253**  | .125**  | -.041** | -.129** | .189**  | .089**  | .396**  | .039*   | .125**  | .249**  | .870**  |         |         |         |         |         |         |         |         |         |         |         |         |        |         |    |  |
| 16  | Control | Number of Camp Sites                       | 4025 | 2.35    | 1.49      | .155**  | .104**  | .166**  | -.172** | .223**  | -.050** | -.147** | -.124** | .334**  | .274**  | -0.003  | .378**  | -.055** | 0.005   | .064**  |         |         |         |         |         |         |         |         |         |         |         |        |         |    |  |
| 17  | Control | Number Climbers Using O2                   | 4025 | 1.05    | 3.08      | .245**  | .152**  | .257**  | .096**  | .247**  | -0.017  | -.213** | -.040*  | .544**  | .490**  | .372**  | .323**  | 0.014   | .145**  | .190**  | .254**  |         |         |         |         |         |         |         |         |         |         |        |         |    |  |
| 18  | Control | Number of Women on Expedition              | 4025 | 0.57    | 1.20      | .037*   | 0.02    | .038*   | .042**  | -0.017  | -0.02   | -.065** | .063**  | .307**  | .149**  | .084**  | .139**  | .039*   | -.031*  | .032*   | 0.018   | .150**  |         |         |         |         |         |         |         |         |         |        |         |    |  |
| 19  | Control | Peak Height in Meters (log)                | 4025 | 8.94    | 0.11      | 0.015   | .136**  | .056**  | .123**  | .490**  | -0.024  | .064**  | -0.022  | .176**  | .177**  | .033*   | .174**  | 0.01    | .124**  | .077**  | .449**  | .378**  | -.049** |         |         |         |         |         |         |         |         |        |         |    |  |
| 20  | Control | High point reached (log)                   | 4001 | 8.89    | 0.13      | .075**  | .162**  | .116**  | .112**  | .477**  | 0.012   | -.382** | -.040*  | .220**  | .252**  | .054**  | .198**  | 0.021   | .159**  | .137**  | .562**  | .425**  | 0.002   | .760**  |         |         |         |         |         |         |         |        |         |    |  |
| 21  | Control | Gini Index                                 | 4025 | 34.08   | 6.15      | -.064** | .248**  | .475**  | -.039*  | .051**  | -0.0002 | -.056** | -0.011  | -.102** | .097**  | .077**  | .099**  | -.033*  | .069**  | .043**  | .085**  | .204**  | .039*   | .061**  | .065**  |         |         |         |         |         |         |        |         |    |  |
| 22  | Control | GDP per capita (log)                       | 4025 | 9.60    | 1.17      | -.378** | -.381** | -.445** | .613**  | .148**  | -.046** | .056**  | .343**  | -.285** | -.105** | -.300** | .152**  | .116**  | .081**  | -.231** | -.144** | .024    | -.065** | -.099** | -.178** |         |         |         |         |         |         |        |         |    |  |
| 23  | Control | Population (log)                           | 4025 | 17.80   | 1.19      | -.027** | .306**  | .461**  | -.034*  | 0.006   | -0.009  | -.084** | 0.005   | -.167** | .152**  | .110**  | .119**  | -0.009  | .050**  | .045**  | .071**  | .232**  | .066**  | 0.006   | 0.029   | .681**  | -.117** |         |         |         |         |        |         |    |  |
| 24  | Control | Climatic Demands Index                     | 4025 | 71.09   | 14.02     | -.166** | -.144** | -.186** | .209**  | .095**  | -0.001  | 0.028   | .059**  | -.131** | -.143** | -0.009  | -.165** | .037*   | -.048** | -.045** | -.079** | -.087** | -0.011  | 0.028   | 0.018   | -.308** | .184**  | -.327** |         |         |         |        |         |    |  |
| 25  | Control | Mean Elevation Native Country (log)        | 4025 | 6.11    | 0.67      | -.028   | 0.026   | -0.016  | .076**  | .140**  | -0.024  | -.042** | 0.003   | 0.012   | -0.027  | .055**  | -0.028  | 0.01    | .077**  | .042**  | 0.009   | .114**  | .111**  | .092**  | .274**  | .080**  | -.083** |         |         |         |         |        |         |    |  |
| 26  | Control | Mean Years of Schooling                    | 4025 | 9.76    | 2.23      | .074**  | -.333** | -.042** | .452**  | .091**  | -.056** | 0.013   | .302**  | -.240** | -.050** | -0.011  | -.207** | .158**  | .107**  | .072**  | -.162** | -.104** | -0.013  | -.106** | -.103** | .046**  | .661**  | -.062** | .380**  | -.190** |         |        |         |    |  |
| 27  | Control | Industrial Performance Index               | 4025 | 0.35    | 0.19      | .288**  | -.193** | .184**  | -.304** | -.225** | -0.008  | -0.002  | -0.03   | .052**  | .073**  | 0.014   | .143**  | -0.005  | -.054** | -.060** | 0.02    | -0.026  | 0.03    | -.182** | -.165** | .256**  | .226**  | .464**  | -.394** | -.070** | .251**  |        |         |    |  |
| 28  | Control | Democracy Index                            | 4025 | 7.97    | 1.10      | -.058** | -.590** | -.525** | -.101** | -.110** | 0.011   | .102**  | 0.022   | -.167** | -.043** | -.138** | -.072** | 0.018   | -.088** | -.087** | -.069** | -.234** | -.035*  | -.132** | -.159** | -.413** | .486**  | -.314** | .057**  | -.283** | .319**  | .277** |         |    |  |
| 29  | DV      | Total Summits                              | 4025 | 2.26    | 3.35      | .213**  | .135**  | .225**  | .072**  | .131**  | 0.0003  | -.594** | -0.025  | .504**  | .481**  | .303**  | .255**  | 0.023   | .126**  | .212**  | .167**  | .617**  | .219**  | 0.004   | .292**  | .140**  | -.106** | .194**  | -.080** | .091**  | -.082** | 0.015  | -.209** |    |  |
| 30  | DV      | Total Deaths                               | 4025 | 0.13    | 0.59      | .063**  | .060**  | .073**  | -.132** | -.067** | -0.018  | .071**  | -.001** | -.173** | .090**  | .107**  | .218**  | -.033*  | -.038** | -0.001  | .077**  | 0.01    | 0.005   | -.109** | 0.018   | -.034*  | -.032*  | -.081** | 0.028   | -0.021  | -.037*  |        |         |    |  |

IV=Independent Variable; DV=Dependent Variable  
\*p ≤ .05; \*\*p ≤ .01
