# Supplementary material
Source: PubMed Central journal article supplement (PMC4321300)
Supplement: pnas.1408800112.st04.pdf [file pnas.1408800112.st04.pdf]

**Table S4.** Correlations among independent variables, other cultural control variables, and dependent variables. Hierarchy composite consists of hierarchy and egalitarianism (reversed). Embeddedness composite consists of embeddedness and intellectual autonomy (reversed) and affective autonomy (reversed).

| No. | Type    | Variable                                   | Obs. | Mean  | Std. Dev. | 1       | 2       | 3       | 4       | 5       | 6       | 7       | 8      | 9       | 10     |
|-----|---------|--------------------------------------------|------|-------|-----------|---------|---------|---------|---------|---------|---------|---------|--------|---------|--------|
| 1   | IV      | Hierarchy Composite (Schwartz)             | 4025 | -0.24 | 1.07      |         |         |         |         |         |         |         |        |         |        |
| 2   | IV      | Power Distance (Hofstede)                  | 4025 | 51.82 | 16.30     | .309**  |         |         |         |         |         |         |        |         |        |
| 3   | IV      | Hierarchy (Schwartz and Hofstede) Combined | 4025 | -0.35 | 0.83      | .953**  | .582**  |         |         |         |         |         |        |         |        |
| 4   | Control | Mastery (Schwartz)                         | 4025 | 3.96  | 0.16      | .743**  | -0.012  | .631**  |         |         |         |         |        |         |        |
| 5   | Control | Harmony (Schwartz)                         | 4025 | 4.11  | 0.34      | -.601** | -0.011  | -.519** | -.649** |         |         |         |        |         |        |
| 6   | Control | Embeddedness Index (Schwartz)              | 4025 | -0.86 | 0.66      | .580**  | .362**  | .611**  | .571**  | -.513** |         |         |        |         |        |
| 7   | Control | Individualism (IDV; Hofstede)              | 4025 | 58.15 | 21.82     | -.511** | -.500** | -.596** | -.331** | 0.00002 | -.406** |         |        |         |        |
| 8   | Control | Masculinity (MAS; Hofstede)                | 4025 | 59.99 | 22.00     | .315**  | -.215** | .199**  | .273**  | .112**  | -.043** | .071**  |        |         |        |
| 9   | Control | Uncertainty Avoidance (UAI; Hofstede)      | 4025 | 72.93 | 19.99     | .111**  | .489**  | .250**  | -.215** | .358**  | -.092** | -.566** | .136** |         |        |
| 10  | DV      | Total Summits                              | 4025 | 2.26  | 3.35      | .213**  | .135**  | .225**  | .204**  | -.087** | .151**  | -.121** | .037*  | -.066** |        |
| 11  | DV      | Total Deaths                               | 4025 | 0.13  | 0.59      | .063**  | .060**  | .073**  | 0.026   | -0.009  | 0.011   | -.053** | 0.02   | .058**  | -.037* |

IV=Independent Variable; DV=Dependent Variable

\*p ≤ .05; \*\*p ≤ .01
