# Supplementary material
Source: PubMed Central journal article supplement (PMC4321300)
Supplement: pnas.1408800112.st07.pdf [file pnas.1408800112.st07.pdf]

**Table S7.** Results from zero-inflated negative binomial regression using data from different time periods. Number of climber summits and number of climber deaths are the dependent variables and the combined Schwartz and Hofstede hierarchy measure is the independent variable.

| Variable                                          | Summits<br>Last 50 Years<br>(1963-2012) | Deaths<br>Last 50 Years<br>(1963-2012) | Summits<br>Last 40 Years<br>(1973-2012) | Deaths<br>Last 40 Years<br>(1973-2012) | Summits<br>Last 30 Years<br>(1983-2012) | Deaths<br>Last 30 Years<br>(1983-2012) | Summits<br>Last 20 Years<br>(1993-2012) | Deaths<br>Last 20 Years<br>(1993-2012) | Summits<br>Last 10 Years<br>(2003-2012) | Deaths<br>Last 10 Years<br>(2003-2012) |
|---------------------------------------------------|-----------------------------------------|----------------------------------------|-----------------------------------------|----------------------------------------|-----------------------------------------|----------------------------------------|-----------------------------------------|----------------------------------------|-----------------------------------------|----------------------------------------|
| <b>Hierarchy (Schwartz and Hofstede) Combined</b> | <b>.201*** (.051)</b>                   | <b>.715*** (.137)</b>                  | <b>.171*** (.047)</b>                   | <b>.691*** (.149)</b>                  | <b>.141** (.052)</b>                    | <b>.809*** (.176)</b>                  | <b>.175** (.056)</b>                    | <b>.998*** (.247)</b>                  | <b>.223*** (.062)</b>                   | <b>1.256** (.367)</b>                  |
| Region Fixed Effect                               | Included                                | Included                               |
| Season Fixed Effect                               | Included                                | Included                               |
| Year                                              | 0.005 (0.004)                           | -0.042** (0.014)                       | 0.005 (0.004)                           | -0.043** (0.015)                       | 0.003 (0.004)                           | -0.043** (0.014)                       | -0.001 (0.005)                          | -0.043 (0.030)                         | -0.0005 (0.009)                         | -0.128* (0.056)                        |
| Standard Route Dummy (1=yes, 0=no)                | 0.086 (0.059)                           | -0.454* (0.216)                        | 0.080 (0.055)                           | -0.442* (0.215)                        | 0.071 (0.051)                           | -0.444 (0.250)                         | 0.059 (0.061)                           | -0.555 (0.408)                         | -0.057 (0.071)                          | -0.160 (0.577)                         |
| Terminated Because Too Risky (1=yes, 0=no)        | (omitted)                               | 0.054 (0.252)                          | (omitted)                               | 0.167 (0.230)                          | (omitted)                               | 0.257 (0.262)                          | (omitted)                               | 0.340 (0.281)                          | (omitted)                               | 0.568 (0.345)                          |
| Illegal Expedition (1=yes, 0=no)                  | 0.028 (0.108)                           | (omitted)                              | 0.011 (0.122)                           | (omitted)                              | 0.006 (0.136)                           | (omitted)                              | 0.147 (0.139)                           | (omitted)                              | (omitted)                               | (omitted)                              |
| Average Age of Climbers                           | -0.003 (0.002)                          | -0.020 (0.015)                         | -0.003 (0.002)                          | -0.016 (0.016)                         | -0.004 (0.003)                          | -0.009 (0.016)                         | -0.004 (0.003)                          | 0.003 (0.022)                          | -0.002 (0.003)                          | 0.036 (0.026)                          |
| Number of Expedition Members                      | 0.043*** (0.007)                        | -0.017 (0.015)                         | 0.042*** (0.007)                        | -0.030* (0.013)                        | 0.048*** (0.008)                        | -0.021 (0.026)                         | 0.045*** (0.008)                        | 0.009 (0.055)                          | 0.042*** (0.009)                        | 0.012 (0.042)                          |
| Number of Hired Sherpas                           | 0.133*** (0.016)                        | 0.181*** (0.039)                       | 0.133*** (0.016)                        | 0.144** (0.047)                        | 0.123*** (0.015)                        | 0.118 (0.061)                          | 0.118*** (0.013)                        | 0.133 (0.072)                          | 0.113*** (0.011)                        | 0.165 (0.089)                          |
| Number of Hired Non-sherpas                       | 0.019*** (0.005)                        | 0.260** (0.098)                        | 0.020*** (0.005)                        | 0.256* (0.101)                         | 0.019*** (0.004)                        | 0.255* (0.100)                         | 0.022*** (0.003)                        | 0.270* (0.107)                         | 0.028*** (0.005)                        | 0.257* (0.118)                         |
| Unique Expedition Roles                           | -0.018 (0.017)                          | 0.126* (0.064)                         | -0.020 (0.018)                          | 0.125 (0.065)                          | -0.006 (0.018)                          | 0.152 (0.078)                          | 0.017 (0.024)                           | -0.020 (0.108)                         | 0.039 (0.036)                           | -0.068 (0.153)                         |
| Leader Experience                                 | 0.008* (0.003)                          | 0.021 (0.018)                          | 0.008* (0.003)                          | 0.022 (0.018)                          | 0.007 (0.003)                           | 0.023 (0.019)                          | 0.007* (0.003)                          | 0.026 (0.022)                          | 0.005 (0.003)                           | 0.040 (0.024)                          |
| Average Climber Experience                        | -0.008 (0.008)                          | -0.051 (0.066)                         | -0.009 (0.009)                          | -0.049 (0.064)                         | -0.008 (0.010)                          | -0.048 (0.068)                         | -0.014 (0.010)                          | -0.051 (0.078)                         | -0.019 (0.013)                          | -0.088 (0.076)                         |
| Standard Deviation of Climber Experience          | 0.011** (0.004)                         | 0.026 (0.042)                          | 0.012** (0.005)                         | 0.031 (0.040)                          | 0.013* (0.005)                          | 0.030 (0.040)                          | 0.016** (0.005)                         | 0.012 (0.054)                          | 0.017* (0.007)                          | 0.038 (0.057)                          |
| Number of Camp Sites                              | 0.067** (0.022)                         | -0.053 (0.035)                         | 0.075** (0.023)                         | -0.042 (0.035)                         | 0.090*** (0.019)                        | -0.073 (0.059)                         | 0.101*** (0.022)                        | 0.090 (0.105)                          | 0.112*** (0.025)                        | 0.109 (0.193)                          |
| Number Climbers Using O2                          | 0.008 (0.008)                           | -0.012 (0.029)                         | 0.009 (0.009)                           | -0.008 (0.031)                         | 0.002 (0.008)                           | -0.023 (0.035)                         | -0.0001 (0.008)                         | -0.035 (0.039)                         | -0.004 (0.009)                          | -0.036 (0.052)                         |
| Number of Women on Expedition                     | 0.004 (0.010)                           | -0.043 (0.040)                         | 0.003 (0.010)                           | -0.033 (0.038)                         | 0.001 (0.015)                           | -0.126* (0.056)                        | -0.004 (0.016)                          | -0.208* (0.099)                        | -0.006 (0.020)                          | -0.412* (0.172)                        |
| Peak Height in Meters (log)                       | -2.607*** (0.217)                       | 5.045** (1.482)                        | -2.598*** (0.243)                       | 4.621** (1.662)                        | -2.338*** (0.272)                       | 3.872* (1.522)                         | -2.102*** (.327)                        | 5.633* (2.413)                         | -1.542*** (.301)                        | 4.940 (2.876)                          |
| High Point Reached (log)                          | (omitted)                               | -0.744 (0.598)                         | (omitted)                               | -0.454 (0.686)                         | (omitted)                               | 0.176 (0.702)                          | (omitted)                               | -0.643 (1.265)                         | (omitted)                               | -1.982 (1.826)                         |
| Number of Climbers Summited                       | (omitted)                               | -0.107** (0.040)                       | (omitted)                               | -0.092* (0.038)                        | (omitted)                               | -0.065 (0.045)                         | (omitted)                               | -0.073 (0.044)                         | (omitted)                               | -0.030 (0.062)                         |
| Gini Index                                        | 0.007 (0.004)                           | -0.008 (0.013)                         | 0.007 (0.004)                           | -0.012 (0.014)                         | 0.008* (0.004)                          | -0.012 (0.014)                         | 0.011** (0.004)                         | -0.017 (0.022)                         | 0.008* (0.004)                          | -0.022 (0.035)                         |
| GDP per capita (log)                              | 0.056 (0.060)                           | 0.213 (0.143)                          | -0.004 (0.047)                          | 0.129 (0.177)                          | -0.039 (0.046)                          | 0.243 (0.178)                          | -0.025 (0.058)                          | 0.398 (0.242)                          | 0.059 (0.066)                           | 0.744* (0.342)                         |
| Population (log)                                  | -0.016 (0.019)                          | 0.029 (0.071)                          | -0.016 (0.018)                          | 0.034 (0.079)                          | -0.004 (0.020)                          | -0.027 (0.073)                         | -0.026 (0.024)                          | -0.001 (0.132)                         | -0.035 (0.022)                          | -0.247 (0.222)                         |
| Climatic Demands Index                            | 0.001 (0.002)                           | 0.001 (0.007)                          | -0.0002 (0.002)                         | -0.001 (0.007)                         | -0.0005 (0.002)                         | 0.002 (0.008)                          | -0.00003 (0.002)                        | -0.008 (0.009)                         | -0.002 (0.002)                          | -0.002 (0.011)                         |
| Mean Elevation Native Country (log)               | 0.018 (0.021)                           | -0.134 (0.070)                         | 0.027 (0.020)                           | -0.152* (0.069)                        | 0.028 (0.022)                           | -0.092 (0.089)                         | 0.009 (0.028)                           | -0.096 (0.149)                         | 0.027 (0.037)                           | -0.143 (0.202)                         |
| Mean Years of Schooling                           | -0.007 (0.023)                          | 0.050 (0.053)                          | 0.012 (0.020)                           | 0.055 (0.063)                          | 0.027 (0.018)                           | -0.008 (0.063)                         | 0.017 (0.021)                           | 0.041 (0.085)                          | 0.001 (0.028)                           | -0.267 (0.156)                         |
| Industrial Performance Index                      | -0.013 (0.190)                          | -1.449* (0.587)                        | 0.076 (0.187)                           | -1.423* (0.622)                        | 0.067 (0.215)                           | -1.280 (0.655)                         | 0.055 (0.266)                           | -0.807 (0.973)                         | -0.003 (0.284)                          | 0.399 (1.519)                          |
| Democracy Index                                   | -0.036* (0.015)                         | -0.105 (0.073)                         | -0.035* (0.016)                         | -0.093 (0.076)                         | -0.031 (0.017)                          | -0.032 (0.075)                         | -0.027 (0.017)                          | -0.120 (0.091)                         | -0.010 (0.017)                          | -0.094 (0.098)                         |
| Mastery (Schwartz)                                | 0.300* (0.137)                          | 0.495 (0.765)                          | 0.262 (0.137)                           | 0.413 (0.775)                          | 0.181 (0.159)                           | 0.837 (0.765)                          | 0.310 (0.204)                           | 0.891 (1.031)                          | 0.396 (0.232)                           | 1.024 (1.945)                          |
| Harmony (Schwartz)                                | 0.267** (0.092)                         | 1.218** (0.381)                        | 0.241* (0.098)                          | 1.151** (0.386)                        | 0.224* (0.105)                          | 1.270** (0.450)                        | 0.268* (0.129)                          | 1.726** (0.610)                        | 0.295* (0.127)                          | 1.496 (0.810)                          |
| Embeddedness Index (Schwartz)                     | -0.125** (0.046)                        | -0.090 (0.130)                         | -0.149*** (0.042)                       | -0.143 (0.133)                         | -0.173*** (.045)                        | 0.070 (0.161)                          | -0.181*** (.045)                        | 0.323 (0.246)                          | -0.125* (0.050)                         | 0.481 (0.262)                          |
| Individualism (IDV; Hofstede)                     | 0.0004 (0.002)                          | 0.008 (0.006)                          | -0.0008 (0.001)                         | 0.006 (0.006)                          | -0.0005 (0.001)                         | 0.011 (0.006)                          | 0.001 (0.002)                           | 0.016* (0.008)                         | 0.0004 (0.002)                          | 0.021 (0.016)                          |
| Masculinity (MAS; Hofstede)                       | -0.001 (0.001)                          | -0.007 (0.004)                         | -0.001 (0.001)                          | -0.007 (0.004)                         | 0.00004 (0.001)                         | -0.010* (0.005)                        | 0.00003 (0.002)                         | -0.020** (0.008)                       | -0.0004 (0.002)                         | -0.020* (0.009)                        |
| Uncertainty Avoidance (UAI; Hofstede)             | -0.002 (0.001)                          | 0.002 (0.006)                          | -0.002 (0.001)                          | 0.002 (0.006)                          | -0.001 (0.001)                          | 0.003 (0.006)                          | -0.002 (0.001)                          | -0.002 (0.007)                         | -0.004* (0.002)                         | -0.002 (0.010)                         |
| <b>Observations</b>                               | 3,913                                   | 3,894                                  | 3,819                                   | 3,800                                  | 3,509                                   | 3,490                                  | 2,731                                   | 2,713                                  | 1,693                                   | 1,680                                  |

**Notes:** This table presents coefficients and clustered (robust) standard errors in parentheses (at the country level) from zero-inflated negative binomial regressions with total number of individuals as the inflation variable. Each observation is at the expedition level. Only multi-member, monocultural expeditions were used in these analyses. \*  $p \leq .05$ ; \*\*  $p < .01$ ; \*\*\*  $p < .001$ .
