# Supplementary material
Source: PubMed Central journal article supplement (PMC4321300)
Supplement: pnas.1408800112.st08.pdf [file pnas.1408800112.st08.pdf]

**Table S8.** Results from zero-inflated negative binomial mixed model (random intercept only). Number of climber summits is the dependent variable and the combined Schwartz and Hofstede hierarchy measure is the independent variable. Country was the level 2 variable in this multilevel analysis which is an alternative approach to using clustered robust standard errors to account for the nestedness of expeditions within countries. Regression results when using the Schwartz hierarchy measure and the Hofstede power distance measure individually demonstrate the same pattern of results, *Direct effect model without control variables (i.e. Model 1 specification)*: Hierarchy Composite (Schwartz):  $b=.230$  (.056),  $p<.001$ ; Power Distance (Hofstede):  $b=.005$  (.008),  $p=.082$ .

| Dependent Variable = Number of Climber Summits |                                                   |                           |                                         |                                             |                                              |                                           |                                         |
|------------------------------------------------|---------------------------------------------------|---------------------------|-----------------------------------------|---------------------------------------------|----------------------------------------------|-------------------------------------------|-----------------------------------------|
| Row Number                                     | Variable                                          | Model 1:<br>Direct Effect | Model 2:<br>Environmental Factors Added | Model 3:<br>Risk Preference Variables Added | Model 4:<br>Expedition Characteristics Added | Model 5:<br>Country Characteristics Added | Model 6:<br>Other Cultural Values Added |
| 1                                              | <b>Hierarchy (Schwartz and Hofstede) Combined</b> | <b>.248*** (.065)</b>     | <b>.272*** (.066)</b>                   | <b>.273*** (.065)</b>                       | <b>.120*** (.024)</b>                        | <b>.119** (.037)</b>                      | <b>.216*** (.043)</b>                   |
| 2                                              | Region Fixed Effect                               | --                        | Included                                | Included                                    | Included                                     | Included                                  | Included                                |
| 3                                              | Season Fixed Effect                               | --                        | Included                                | Included                                    | Included                                     | Included                                  | Included                                |
| 4                                              | Year                                              | --                        | 0.005** (0.002)                         | 0.003 (0.002)                               | 0.008*** (0.001)                             | 0.006* (0.003)                            | 0.005 (0.003)                           |
| 5                                              | Standard Route Dummy (1=yes, 0=no)                | --                        | --                                      | 0.150 (0.058)                               | 0.100* (0.041)                               | 0.095* (0.041)                            | 0.090* (0.041)                          |
| 6                                              | Illegal Expedition Dummy (1=yes, 0=no)            | --                        | --                                      | -0.090 (0.178)                              | 0.019 (0.144)                                | 0.016 (0.143)                             | 0.023 (0.143)                           |
| 7                                              | Average Age of Climbers                           | --                        | --                                      | --                                          | -0.002 (0.002)                               | -0.001 (0.002)                            | -0.001 (0.002)                          |
| 8                                              | Number of Expedition Members                      | --                        | --                                      | --                                          | 0.038*** (0.003)                             | 0.039*** (0.003)                          | 0.039*** (0.003)                        |
| 9                                              | Number of Hired Sherpas                           | --                        | --                                      | --                                          | 0.118*** (0.007)                             | 0.129*** (0.007)                          | 0.131*** (0.007)                        |
| 10                                             | Number of Hired Non-sherpas                       | --                        | --                                      | --                                          | 0.023*** (0.005)                             | 0.021*** (0.005)                          | 0.019*** (0.005)                        |
| 11                                             | Unique Expedition Roles                           | --                        | --                                      | --                                          | -0.009 (0.013)                               | -0.023 (0.013)                            | -0.022 (0.013)                          |
| 12                                             | Leader Experience                                 | --                        | --                                      | --                                          | 0.007 (0.004)                                | 0.007 (0.004)                             | 0.008 (0.004)                           |
| 13                                             | Average Climber Experience                        | --                        | --                                      | --                                          | -0.004 (0.008)                               | -0.005 (0.008)                            | -0.008 (0.008)                          |
| 14                                             | Standard Deviation of Climber Experience          | --                        | --                                      | --                                          | 0.008 (0.005)                                | 0.009* (0.005)                            | 0.012* (0.005)                          |
| 15                                             | Number of Camp Sites                              | --                        | --                                      | --                                          | 0.072*** (0.013)                             | 0.074*** (0.013)                          | 0.076*** (0.013)                        |
| 16                                             | Number Climbers Using O2                          | --                        | --                                      | --                                          | 0.007* (0.003)                               | 0.007* (0.004)                            | 0.006 (0.003)                           |
| 17                                             | Number of Women on Expedition                     | --                        | --                                      | --                                          | 0.010 (0.007)                                | 0.003 (0.007)                             | 0.003 (0.007)                           |
| 18                                             | Peak Height in Meters (log)                       | --                        | --                                      | --                                          | --                                           | -2.657*** (0.213)                         | -2.643*** (0.210)                       |
| 19                                             | Gini Index                                        | --                        | --                                      | --                                          | --                                           | 0.003 (0.004)                             | 0.008* (0.004)                          |
| 20                                             | GDP per capita (log)                              | --                        | --                                      | --                                          | --                                           | 0.051 (0.031)                             | 0.053 (0.032)                           |
| 21                                             | Population (log)                                  | --                        | --                                      | --                                          | --                                           | -0.020 (0.022)                            | -0.042 (0.021)                          |
| 22                                             | Climatic Demands Index                            | --                        | --                                      | --                                          | --                                           | 0.001 (0.002)                             | 0.0002 (0.002)                          |
| 23                                             | Mean Elevation Native Country (log)               | --                        | --                                      | --                                          | --                                           | 0.029 (0.031)                             | 0.016 (0.026)                           |
| 24                                             | Mean Years of Schooling                           | --                        | --                                      | --                                          | --                                           | -0.025 (0.014)                            | -0.015 (0.014)                          |
| 25                                             | Industrial Performance Index                      | --                        | --                                      | --                                          | --                                           | 0.171 (0.183)                             | 0.138 (0.162)                           |
| 26                                             | Democracy Index                                   | --                        | --                                      | --                                          | --                                           | -0.026 (0.021)                            | -0.043** (0.016)                        |
| 27                                             | Mastery (Schwartz)                                | --                        | --                                      | --                                          | --                                           | --                                        | 0.312 (0.193)                           |
| 28                                             | Harmony (Schwartz)                                | --                        | --                                      | --                                          | --                                           | --                                        | 0.243** (0.087)                         |
| 29                                             | Embeddedness Index (Schwartz)                     | --                        | --                                      | --                                          | --                                           | --                                        | -0.127*** (0.038)                       |
| 30                                             | Individualism (IDV; Hofstede)                     | --                        | --                                      | --                                          | --                                           | --                                        | 0.001 (0.002)                           |
| 31                                             | Masculinity (MAS; Hofstede)                       | --                        | --                                      | --                                          | --                                           | --                                        | -0.002 (0.001)                          |
| 32                                             | Uncertainty Avoidance (UAI; Hofstede)             | --                        | --                                      | --                                          | --                                           | --                                        | -0.002 (0.001)                          |
| 33                                             | <b>Observations</b>                               | 4,025                     | 4,025                                   | 4,025                                       | 4,025                                        | 4,025                                     | 4,025                                   |

**Notes:** This table presents coefficients and standard errors in parentheses from random intercept zero-inflated negative binomial regressions using the glmmADMB statistical package in R. Expedition country is the level 2 variable in all reported analyses. Each observation is at the expedition level. Only multi-member, monocultural expeditions were used in these analyses. \*  $p \leq .05$ ; \*\*  $p < .01$ ; \*\*\*  $p < .001$ .
